# Supplementary material for: Fabrication of amorphous subnanometric palladium nanostructures on metallic transition metal dichalcogenides for efficient hydrogen evolution reaction
Source: Royal Society of Chemistry journal article supplement (doi:10.1039/d4qi00622d), 2024-01-01
Supplement: d4qi00622d1.pdf [file d4qi00622d1.pdf]

## Electronic Supplementary Information

# Fabrication of Amorphous Subnanometric Palladium Nanostructures on Metallic Transition Metal Dichalcogenides for Efficient Hydrogen Evolution Reaction

Liang Mei<sup>1#</sup>, Yuefeng Zhang<sup>1#</sup>, Zimeng Ye<sup>1</sup>, Ting Han<sup>1</sup>, Honglu Hu, Ruijie Yang<sup>1</sup>, Ting Ying<sup>1</sup>, Weikang Zheng<sup>1</sup>, Ruixin Yan<sup>1</sup>, Yue Zhang<sup>1</sup>, Zhenbin Wang<sup>1</sup>, Zhiyuan Zeng<sup>1,2\*</sup>

<sup>1</sup>Department of Materials Science and Engineering and State Key Laboratory of Marine Pollution, City University of Hong Kong, Hong Kong, People's Republic of China.

<sup>2</sup>Shenzhen Research Institute, City University of Hong Kong, Shenzhen 518057, China

Corresponding authors:

Z.Y. Zeng ([zhiyzeng@cityu.edu.hk](mailto:zhiyzeng@cityu.edu.hk))

These authors contributed equally: Liang Mei, Yuefeng Zhang

## Contents

### 1. Supplementary Figures 1-19

Fig. S1. XRD spectra of bulk MoS<sub>2</sub>, WS<sub>2</sub>, and TiS<sub>2</sub>.

Fig. S2. Photographs of exfoliated MoS<sub>2</sub>, WS<sub>2</sub>, and TiS<sub>2</sub> nanosheets dispersed in DI water.

Fig. S3. Zetapotential of exfoliated MoS<sub>2</sub>, WS<sub>2</sub>, and TiS<sub>2</sub> nanosheets solution.

Fig. S4. Raman spectra of pristine TMDs and Pd-TMDs.

Fig. S5. TEM images of MoS<sub>2</sub>, WS<sub>2</sub>, and TiS<sub>2</sub> nanosheets.

Fig. S6. TEM images of Pd-MoS<sub>2</sub>, Pd-WS<sub>2</sub>, and Pd-TiS<sub>2</sub> composites.

Fig. S7. EDS spectra of Pd-MoS<sub>2</sub>, Pd-WS<sub>2</sub>, and Pd-TiS<sub>2</sub> composites.

Fig. S8. XPS full spectra of pristine TMDs and Pd-TMD composites.

Fig. S9. Zetapotential of Pd-TMD solution.

Fig. S10. XPS spectra of Pd-TMDs after durability test.

Fig. S11. Raman spectra of Pd-TMDs after durability test.

Fig. S12. SEM and HRTEM images of Pd-TMDs after durability test.

Fig. S3. Model diagrams and possible H adsorption sites for TMDs, Pd(111) and Pd(211).

Fig. S14. The adsorption models and corresponding adsorption energy for H adsorbed on different sites of TMDs.

Fig. S15. The adsorption models and corresponding adsorption energy for H adsorbed on different sites of Pd(111) and Pd(211).

Fig. S16. Models of 1 H\* adsorbed on Pd (111) and Pd(211).

Fig. S17. COHP for the ninth H\* bonded to Pd (111).

Fig. S18. COHP for the ninth H\* bonded to Pd (211).

Fig. S19. COHP for the H\* and S in TMDs.

### 2. Supplementary table 1

Table S1. Compare HER performance of Pd-MoS<sub>2</sub>, Pd-WS<sub>2</sub>, and Pd-TiS<sub>2</sub> composites with Pd-decorated 2D catalysts reported in literature.

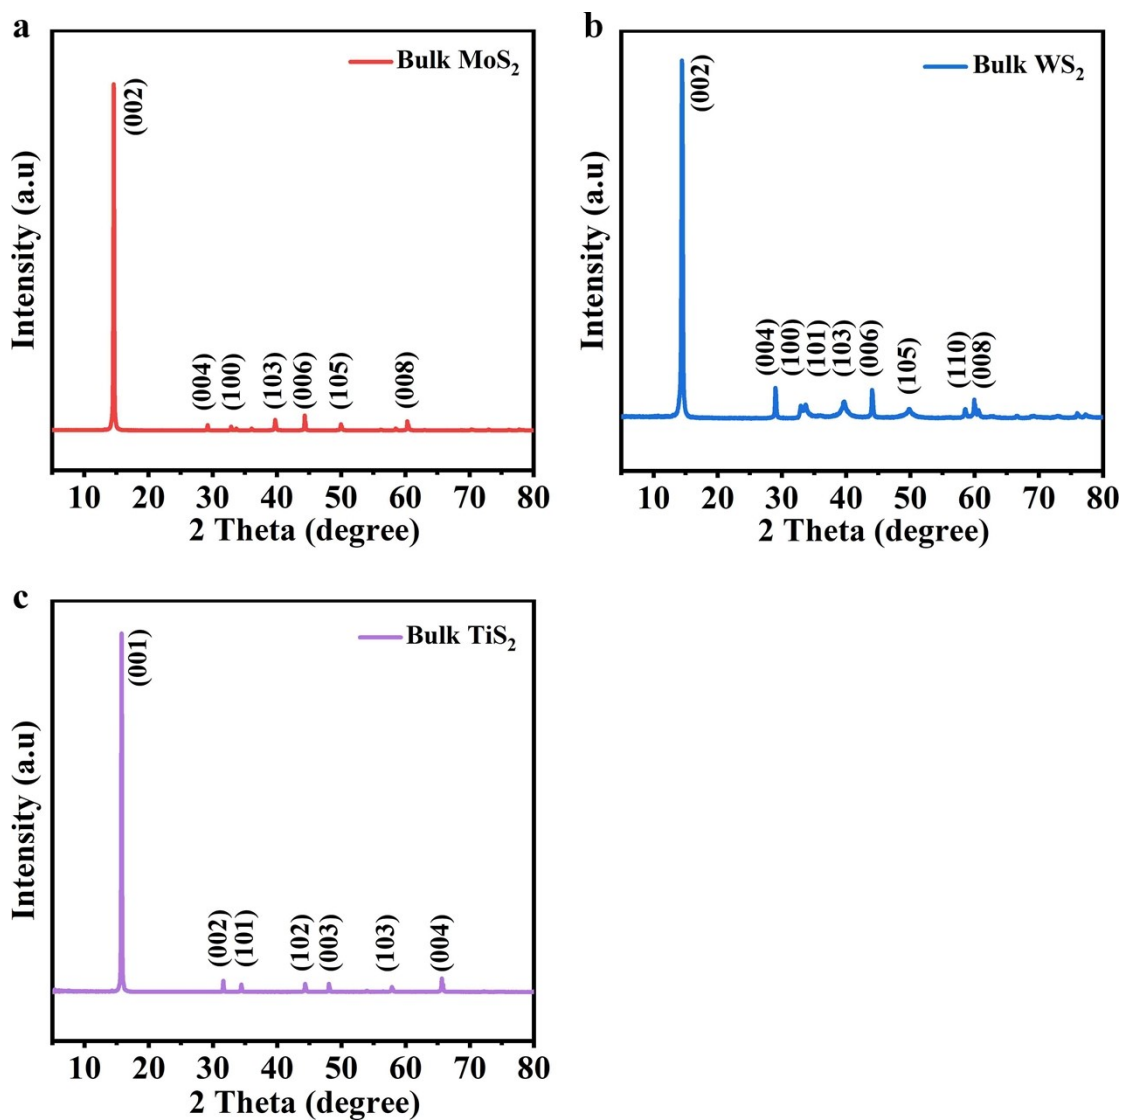

**Fig. S1** | XRD spectra of bulk MoS<sub>2</sub> (a), bulk WS<sub>2</sub> (b) and bulk TiS<sub>2</sub> (c). The high purity phase of bulk MoS<sub>2</sub>, WS<sub>2</sub>, TiS<sub>2</sub> are confirmed; the peaks detected in bulk MoS<sub>2</sub>, bulk WS<sub>2</sub>, and bulk TiS<sub>2</sub> can be well indexed to MoS<sub>2</sub>-PDF#06-0097, WS<sub>2</sub>-PDF#08-0237, and TiS<sub>2</sub>-PDF#15-0853. The strongest peak that corresponding to (002) plane of MoS<sub>2</sub> and WS<sub>2</sub>, as well as (001) plane of TiS<sub>2</sub> indicate their layered structures.

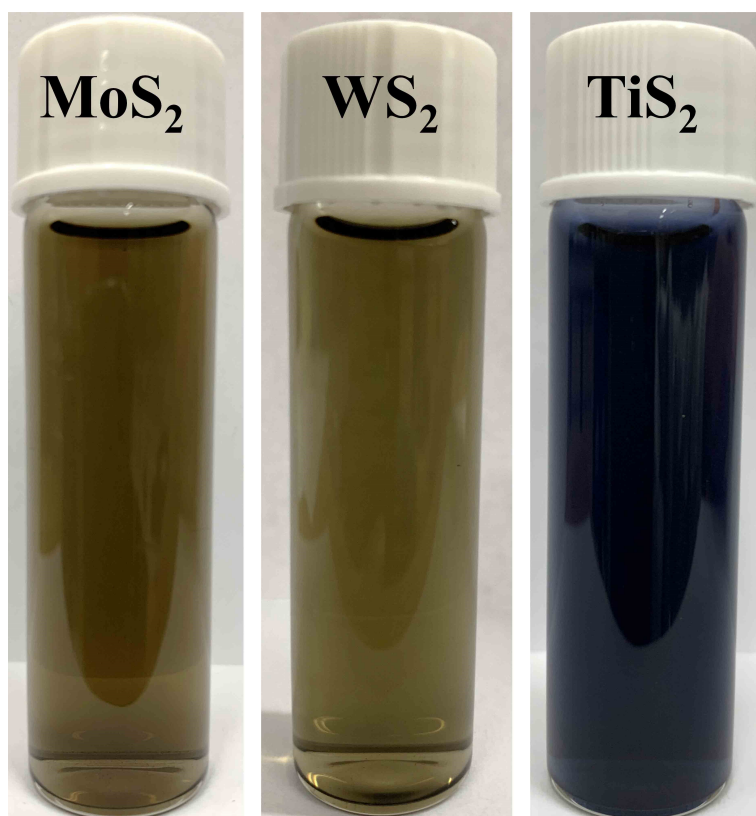

**Fig. S2** | Photographs of exfoliated MoS<sub>2</sub> nanosheets (**a**), WS<sub>2</sub> nanosheets (**b**) and TiS<sub>2</sub> nanosheets (**c**) dispersed in DI water. All these TMD nanosheets are well dispersed in DI water.

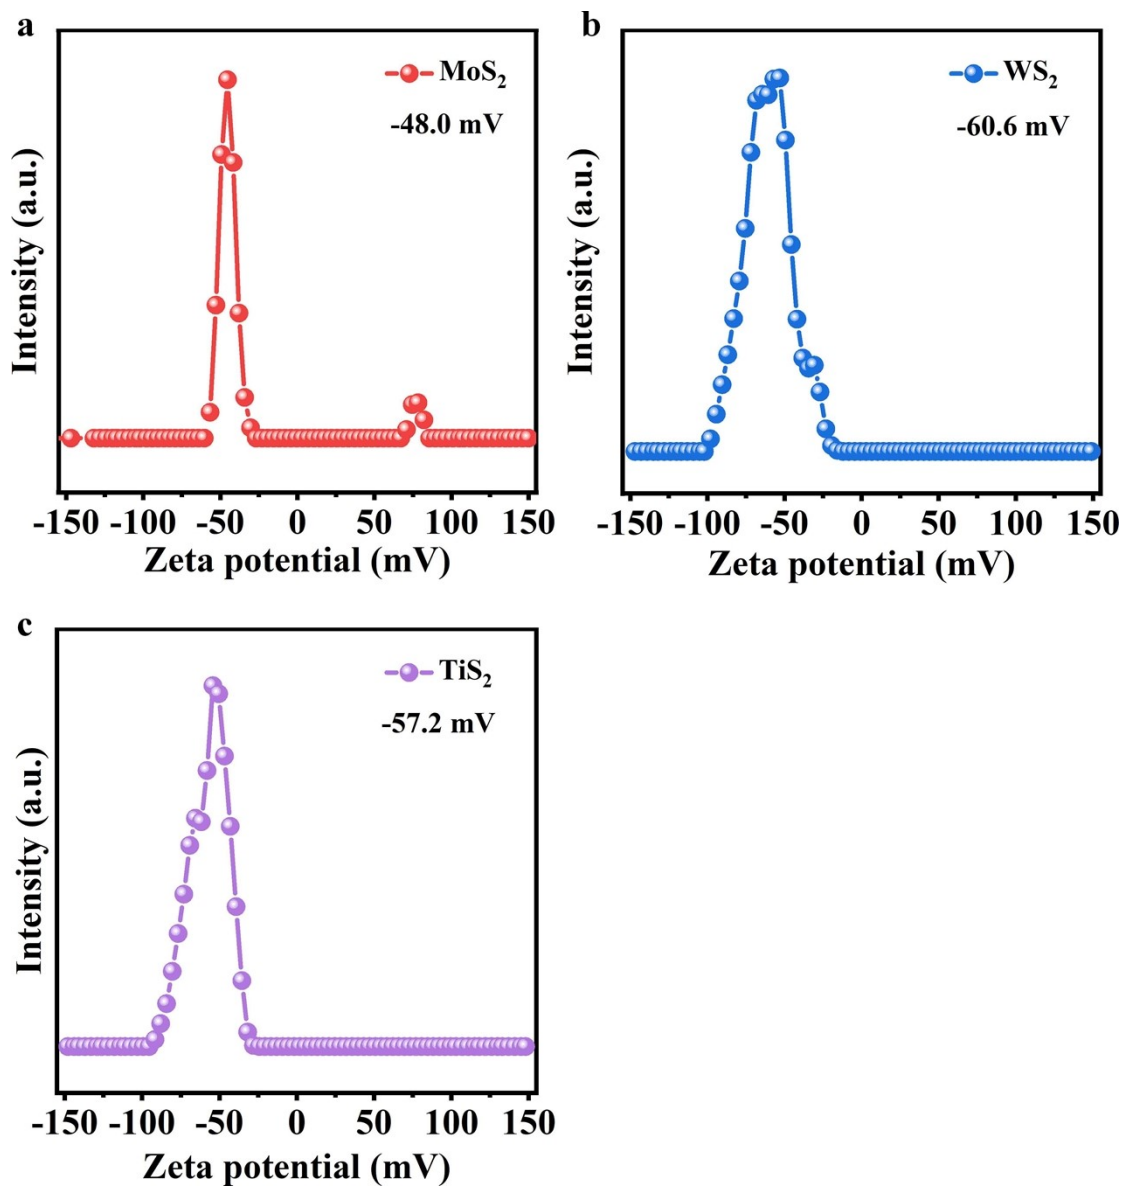

**Fig. S3** | Zeta potential of exfoliated MoS<sub>2</sub> nanosheets solution (a), exfoliated WS<sub>2</sub> nanosheets solution (b) and exfoliated TiS<sub>2</sub> nanosheets solution (c). All the MoS<sub>2</sub>, WS<sub>2</sub>, and TiS<sub>2</sub> nanosheets solution exhibit a negative charge in DI water, which enables their well dispersibility in DI water via electrostatic repulsion.

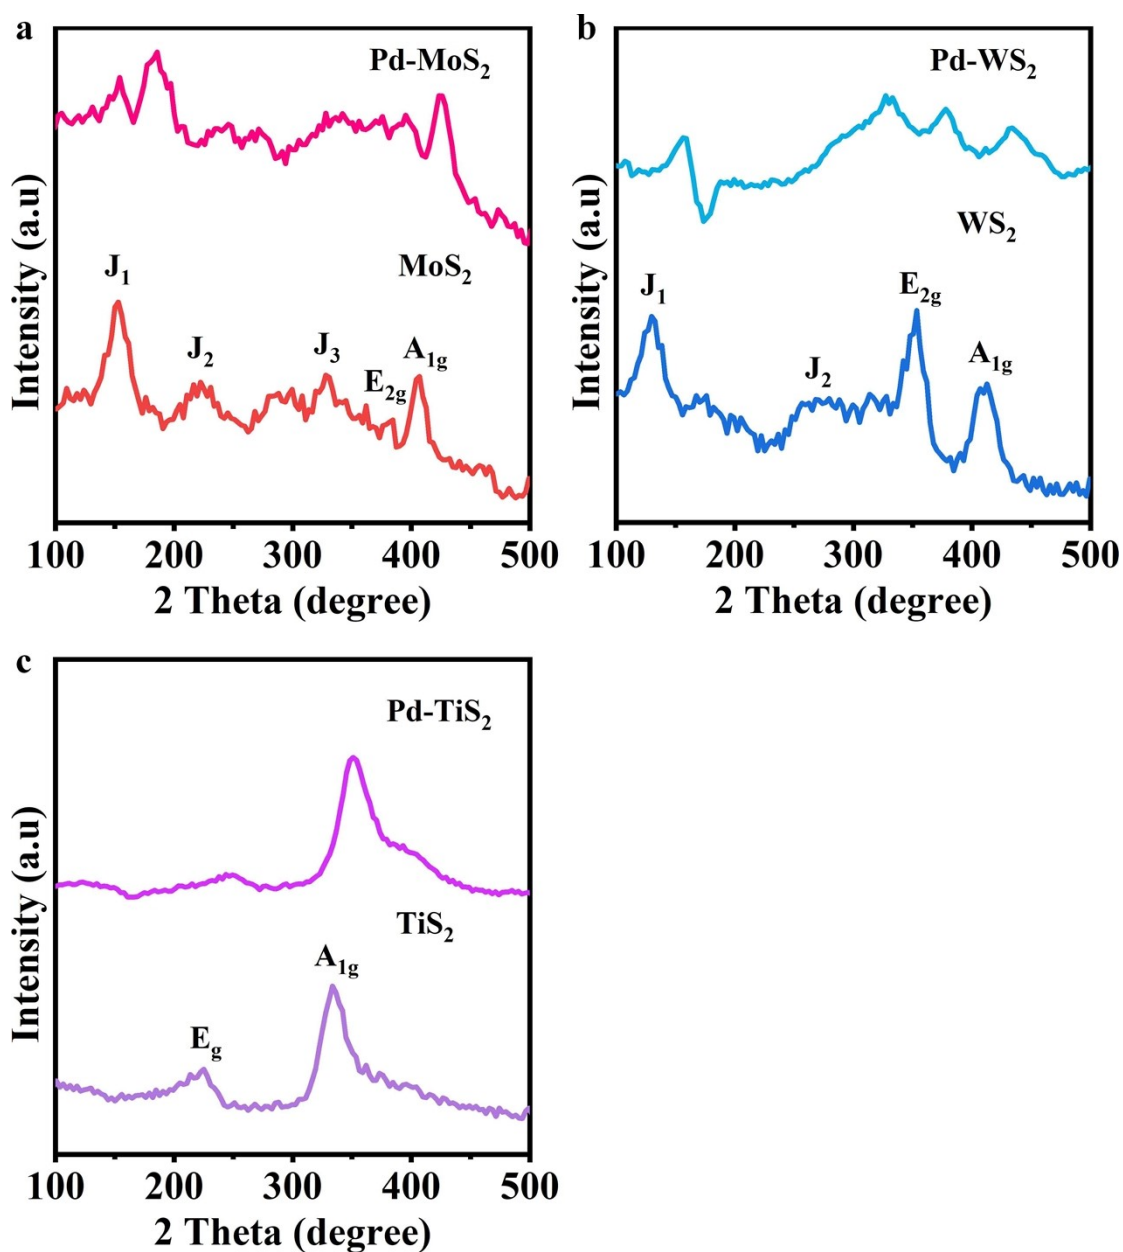

**Fig. S4** | Raman spectra of MoS<sub>2</sub> and Pd-MoS<sub>2</sub> (a), WS<sub>2</sub> and Pd-WS<sub>2</sub> (b), TiS<sub>2</sub> and Pd-TiS<sub>2</sub> (c) nanosheets.

Peaks at 152 cm<sup>-1</sup>, 223 cm<sup>-1</sup>, 329 cm<sup>-1</sup> are corresponding to J<sub>1</sub>, J<sub>2</sub>, J<sub>3</sub> of metallic (1T or 1T') MoS<sub>2</sub>, while the peaks at 381 cm<sup>-1</sup> and 406 cm<sup>-1</sup> are attributed to the E<sub>2g</sub> and A<sub>1g</sub> of semiconducting MoS<sub>2</sub> (Fig. S4a). Peaks at 131 cm<sup>-1</sup>, 271 cm<sup>-1</sup>, 385 cm<sup>-1</sup> are corresponding to J<sub>1</sub>, J<sub>2</sub>, J<sub>3</sub> of metallic (1T or 1T') WS<sub>2</sub>, while the peaks at 353 cm<sup>-1</sup> and 410 cm<sup>-1</sup> are attributed to the E<sub>2g</sub> and A<sub>1g</sub> of semiconducting WS<sub>2</sub> (Fig. S4b). Peaks at 224 cm<sup>-1</sup> and 334 cm<sup>-1</sup> are corresponding to E<sub>g</sub> and A<sub>1g</sub> of 1T TiS<sub>2</sub> (Fig. S4c).

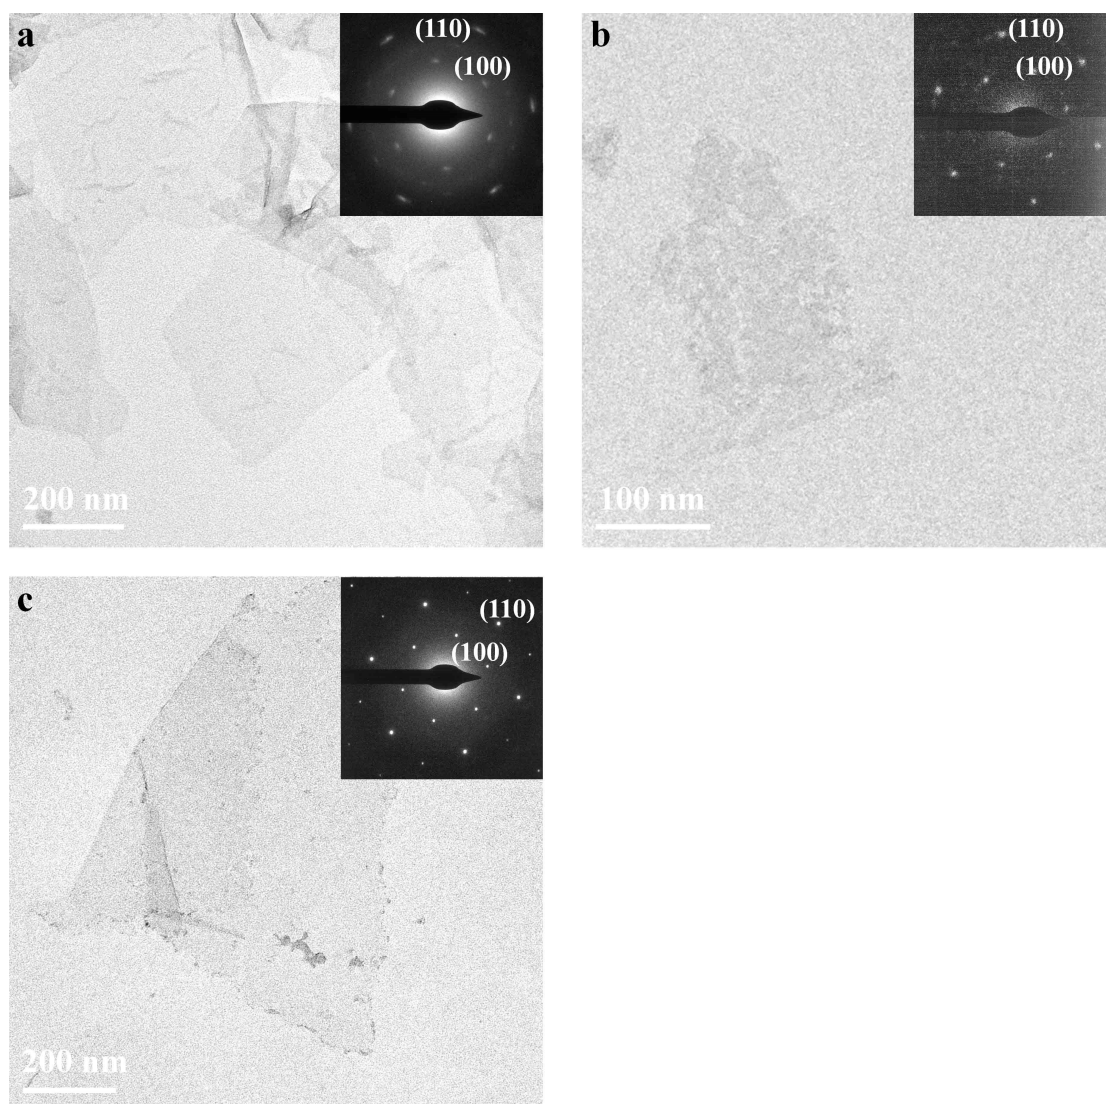

**Fig. S5** | TEM images of exfoliated MoS<sub>2</sub> nanosheets (a), exfoliated WS<sub>2</sub> nanosheets (b) and exfoliated TiS<sub>2</sub> nanosheets (c). The insets show the diffraction patterns. All the MoS<sub>2</sub>, WS<sub>2</sub>, and TiS<sub>2</sub> nanosheets exhibit nanosheets morphology and good crystallinity.

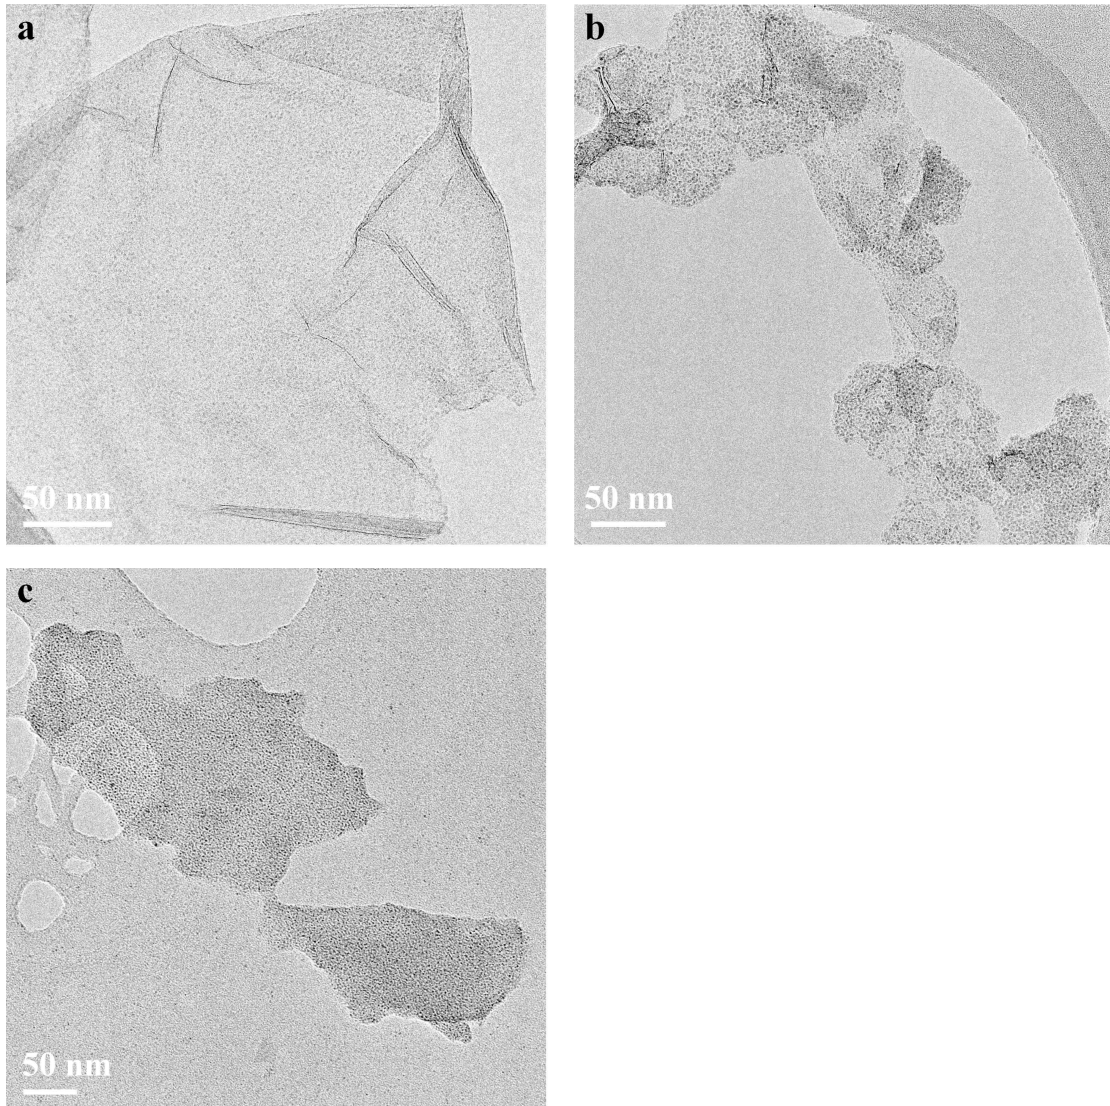

**Fig. S6** | TEM images of Pd-MoS<sub>2</sub> (a), Pd-WS<sub>2</sub> (b) and Pd-TiS<sub>2</sub> (c) composites. The monodispersed Pd nanoparticles are densely decorated onto each TMD nanosheets.



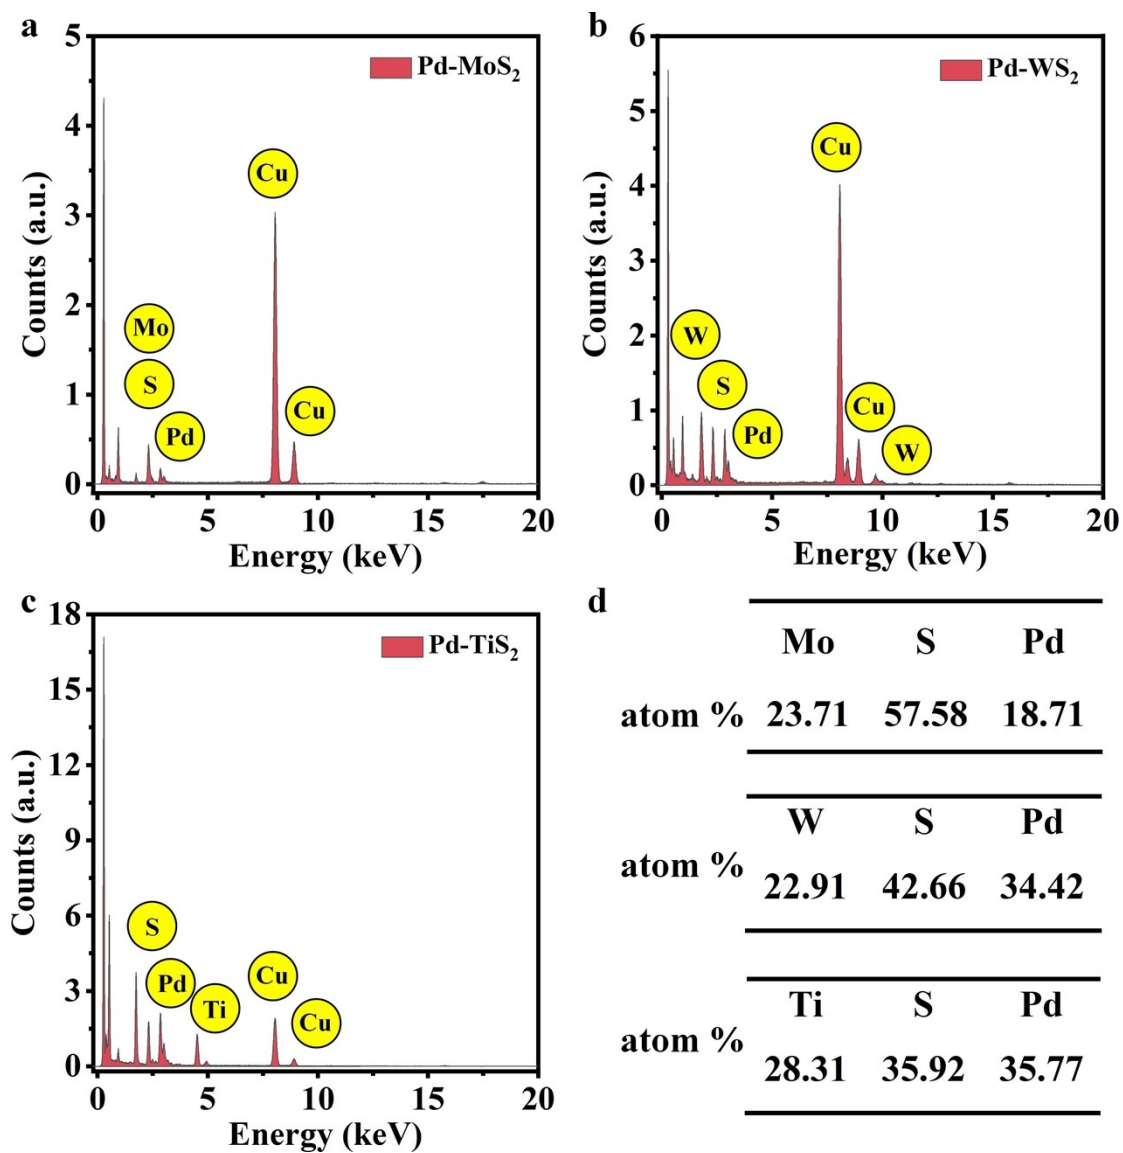

**Fig. S7** | EDS spectra of Pd-MoS<sub>2</sub> (a), Pd-WS<sub>2</sub> (b) and Pd-TiS<sub>2</sub> (c) composites. The atomic ration for each element in Pd-TMD composites are shown in (d).

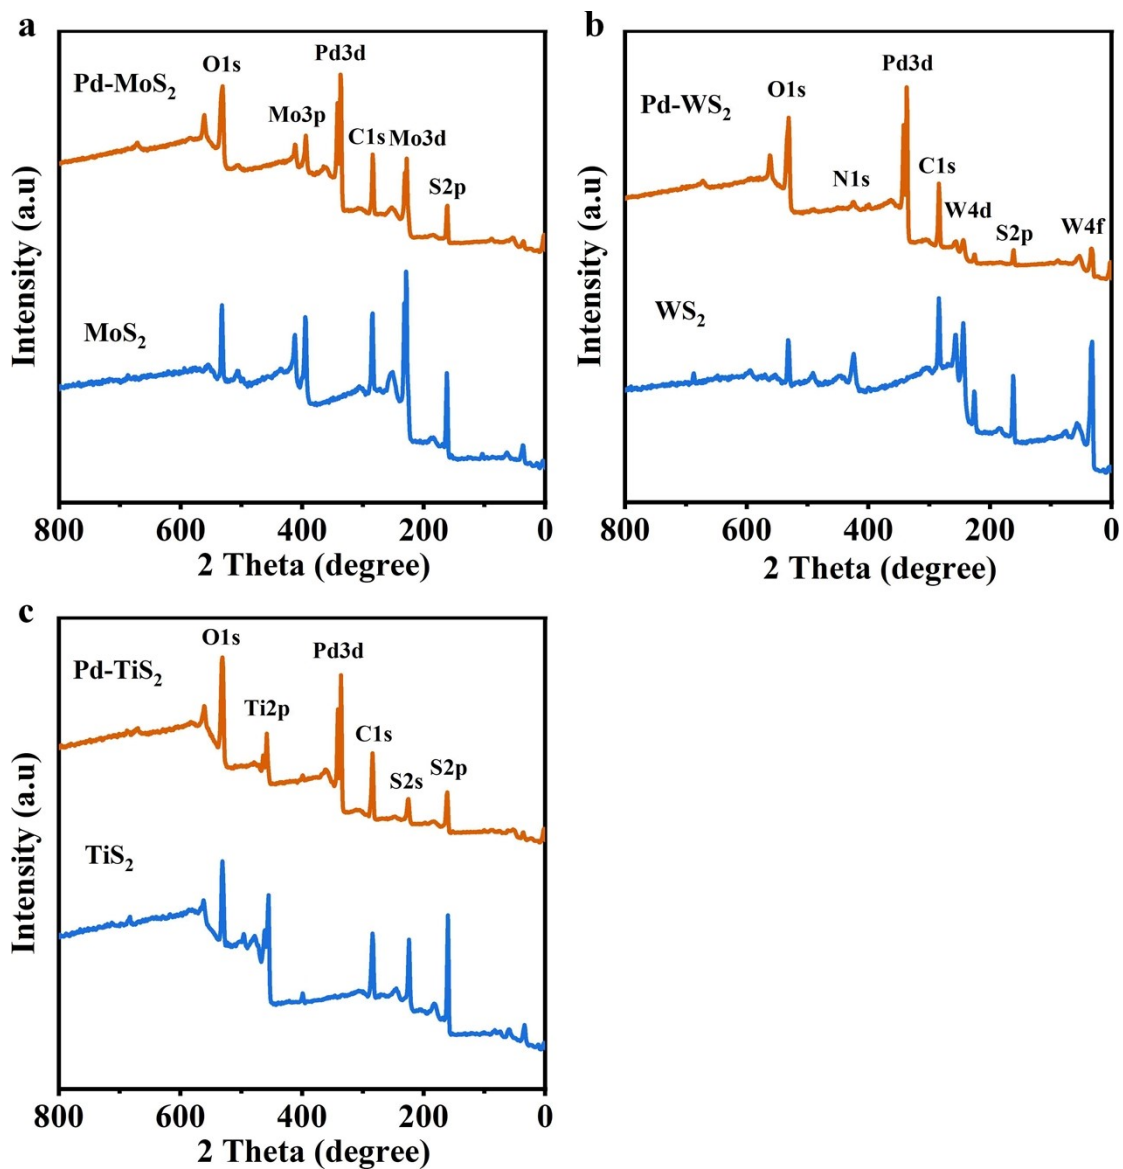

**Fig. S8** | XPS full spectra of Pd-MoS<sub>2</sub> and pristine MoS<sub>2</sub> (a), Pd-WS<sub>2</sub> and pristine WS<sub>2</sub> (b), Pd-TiS<sub>2</sub> and pristine TiS<sub>2</sub> (c). All the Pd-TMD composites exhibit strong Pd3d signal compared with pristine TMD.

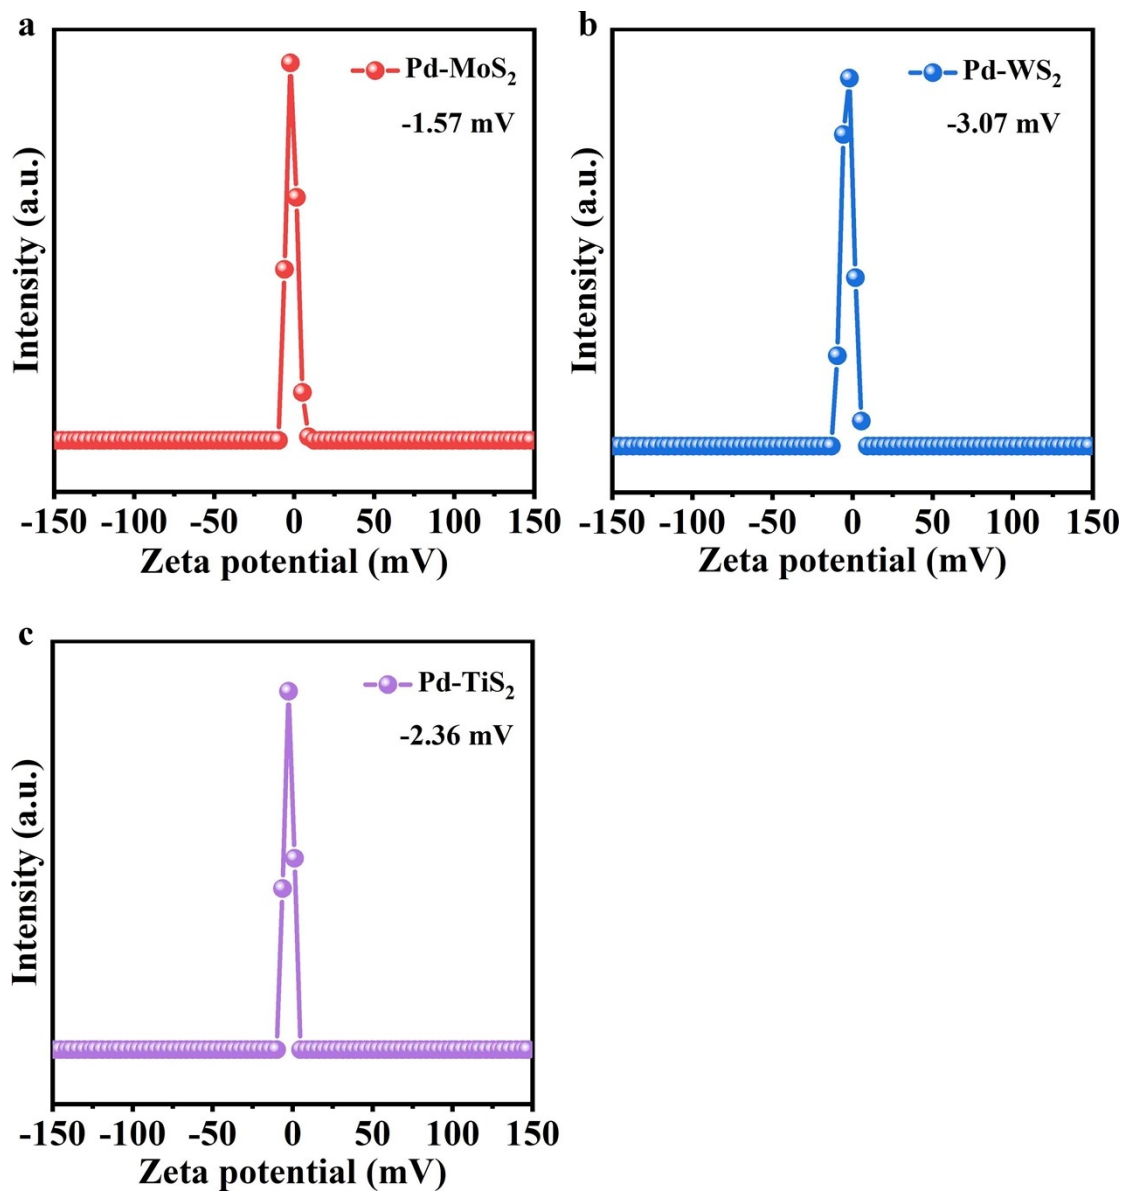

**Fig. S9** | Zeta potential of Pd-MoS<sub>2</sub> (a), Pd-WS<sub>2</sub> (b) and Pd-TiS<sub>2</sub> solution (c).

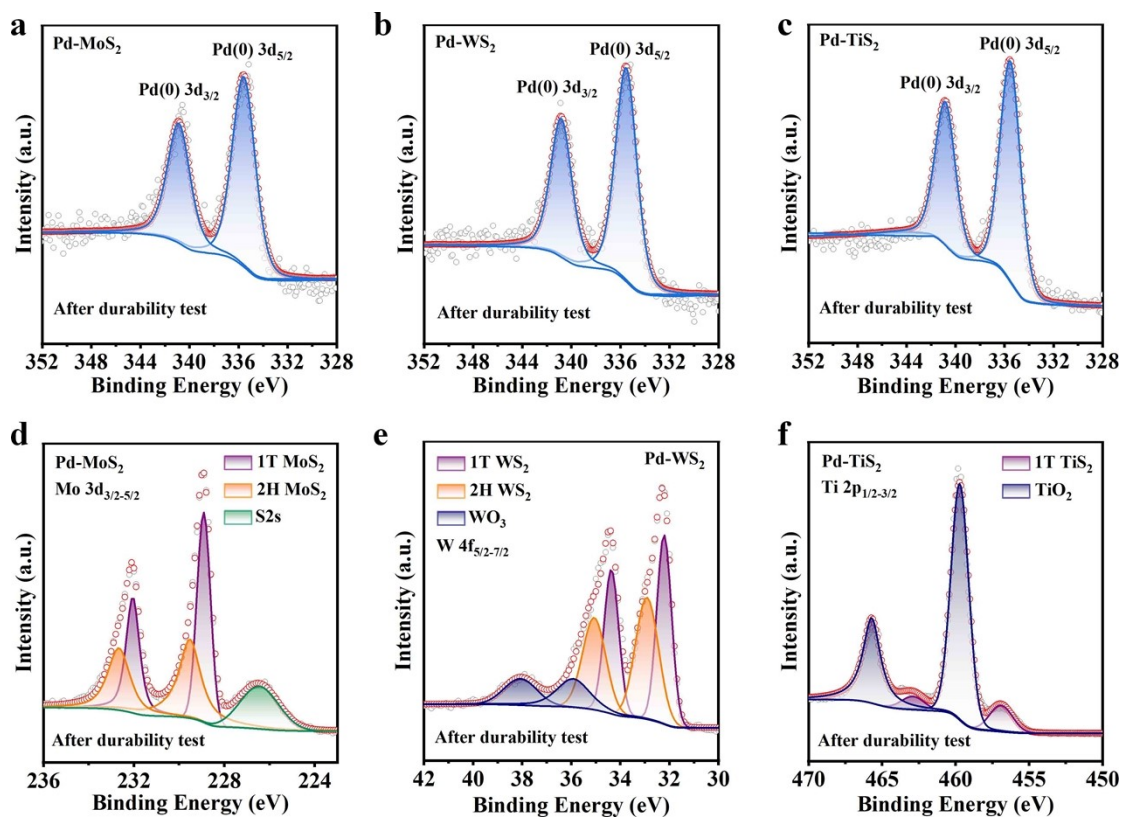

**Fig. S10** | The XPS data for Pd 3d (a-c), Mo 3d (d), W 4f (e), and Ti 2p (f) of Pd-MoS<sub>2</sub>, Pd-WS<sub>2</sub>, and Pd-TiS<sub>2</sub> after durability test.

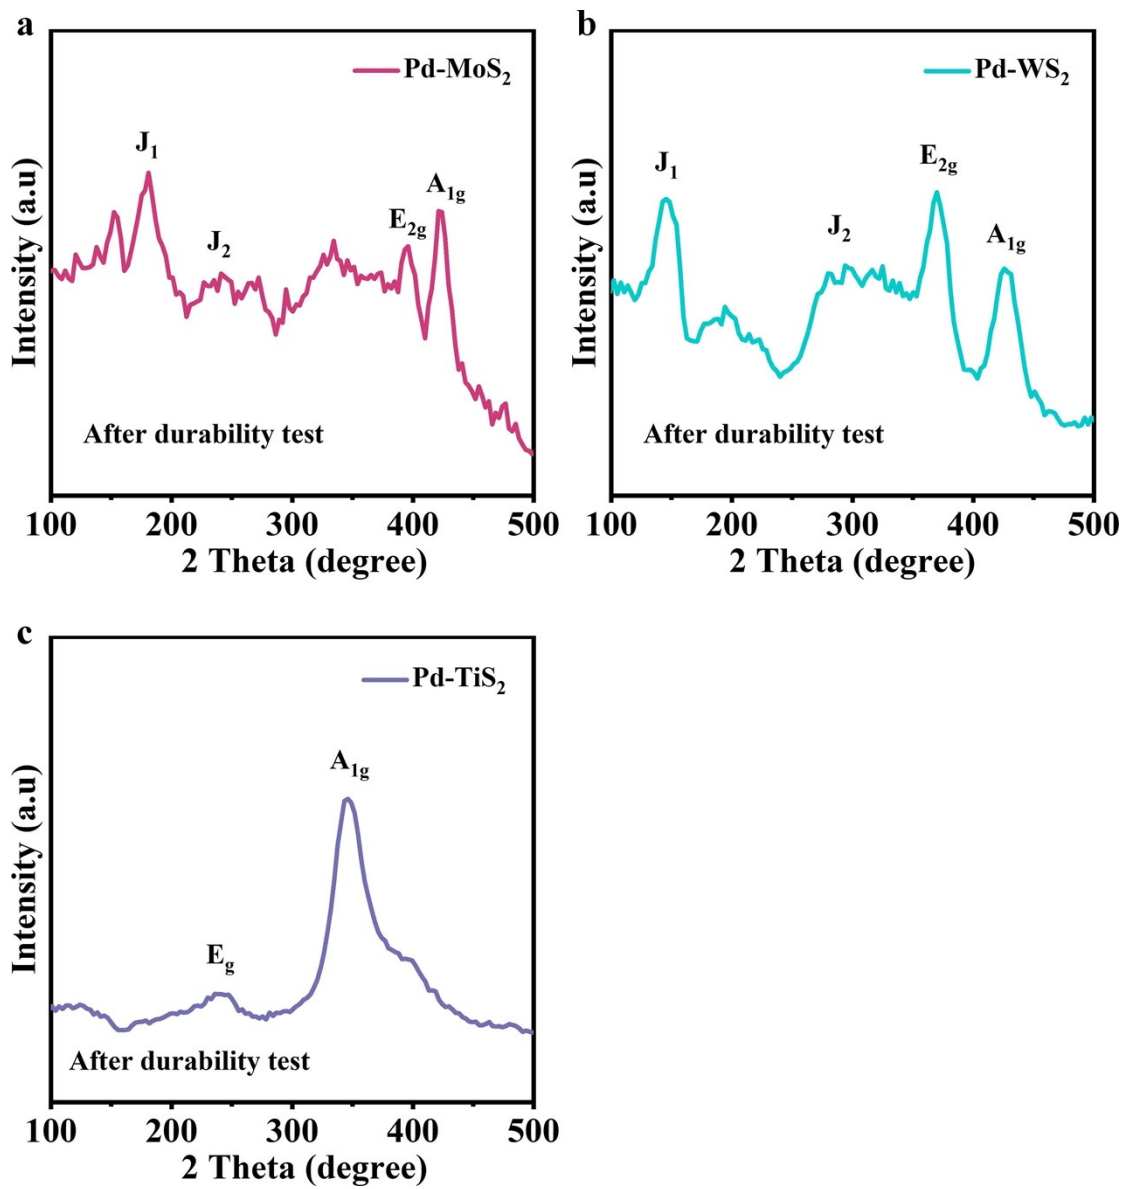

**Fig. S11** | The Raman spectra of Pd-MoS<sub>2</sub>, Pd-WS<sub>2</sub>, and Pd-TiS<sub>2</sub> after durability test.

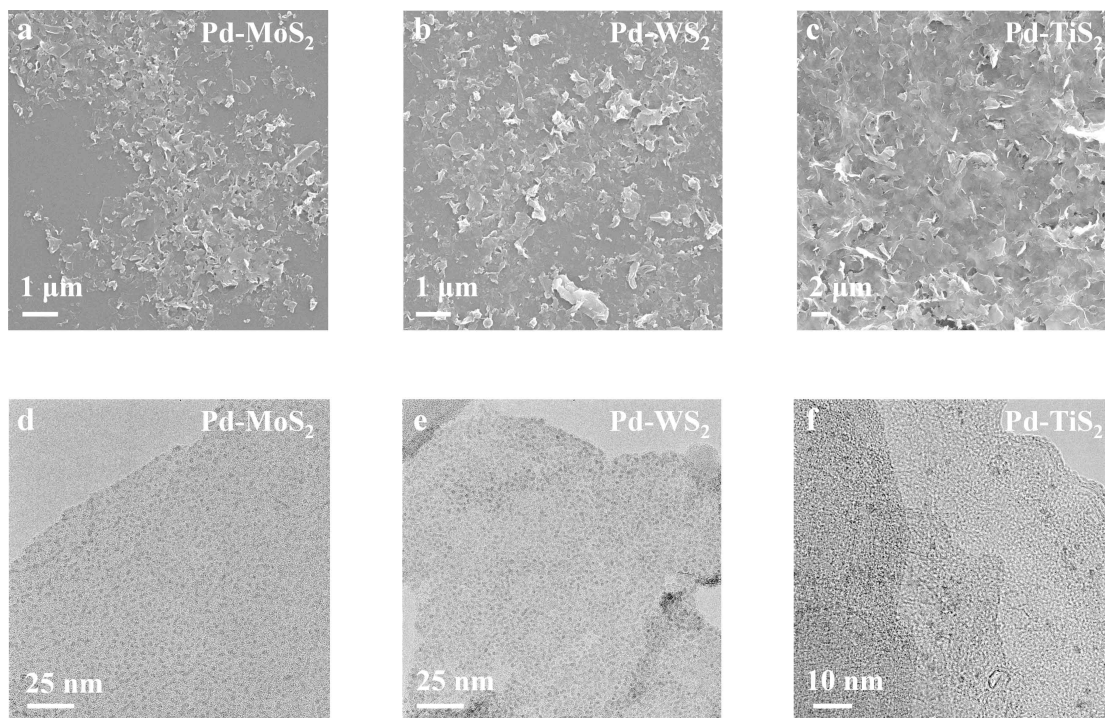

**Fig. S12** | SEM images of Pd-MoS<sub>2</sub> (**a**), Pd-WS<sub>2</sub> (**b**), and Pd-TiS<sub>2</sub> (**c**) after durability test. The corresponding HRTEM images are shown in (**d-f**).

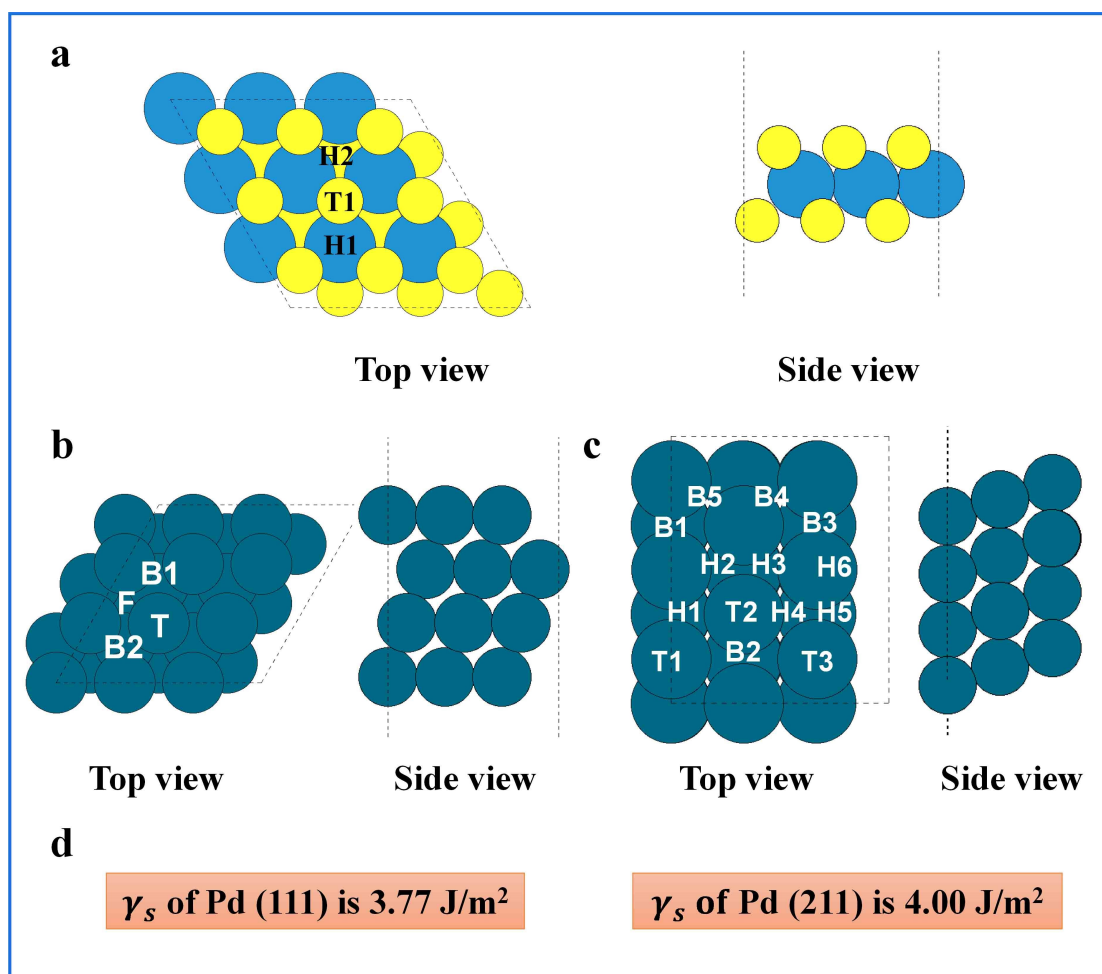

**Fig. S13** | Model diagrams and possible H adsorption sites for TMD (a), Pd (111) (b), and Pd (211) (c). Surface energy value of Pd (111) and Pd (211) (d).

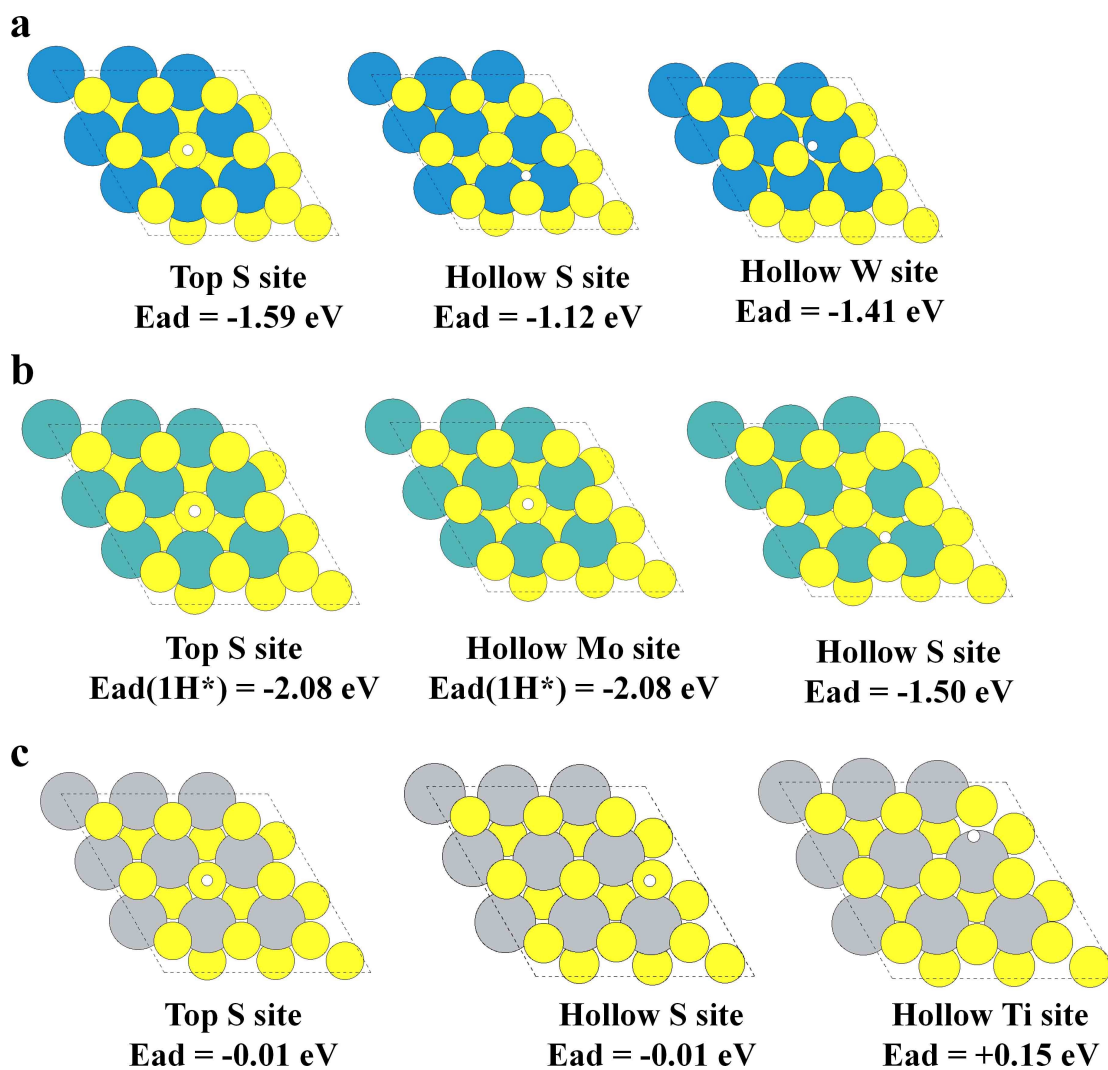

**Fig. S14** | The most stable adsorption models and corresponding adsorption energy values for H adsorbed on different sites of  $\text{TiS}_2$  (a),  $\text{WS}_2$  (b), and  $\text{MoS}_2$  (c).



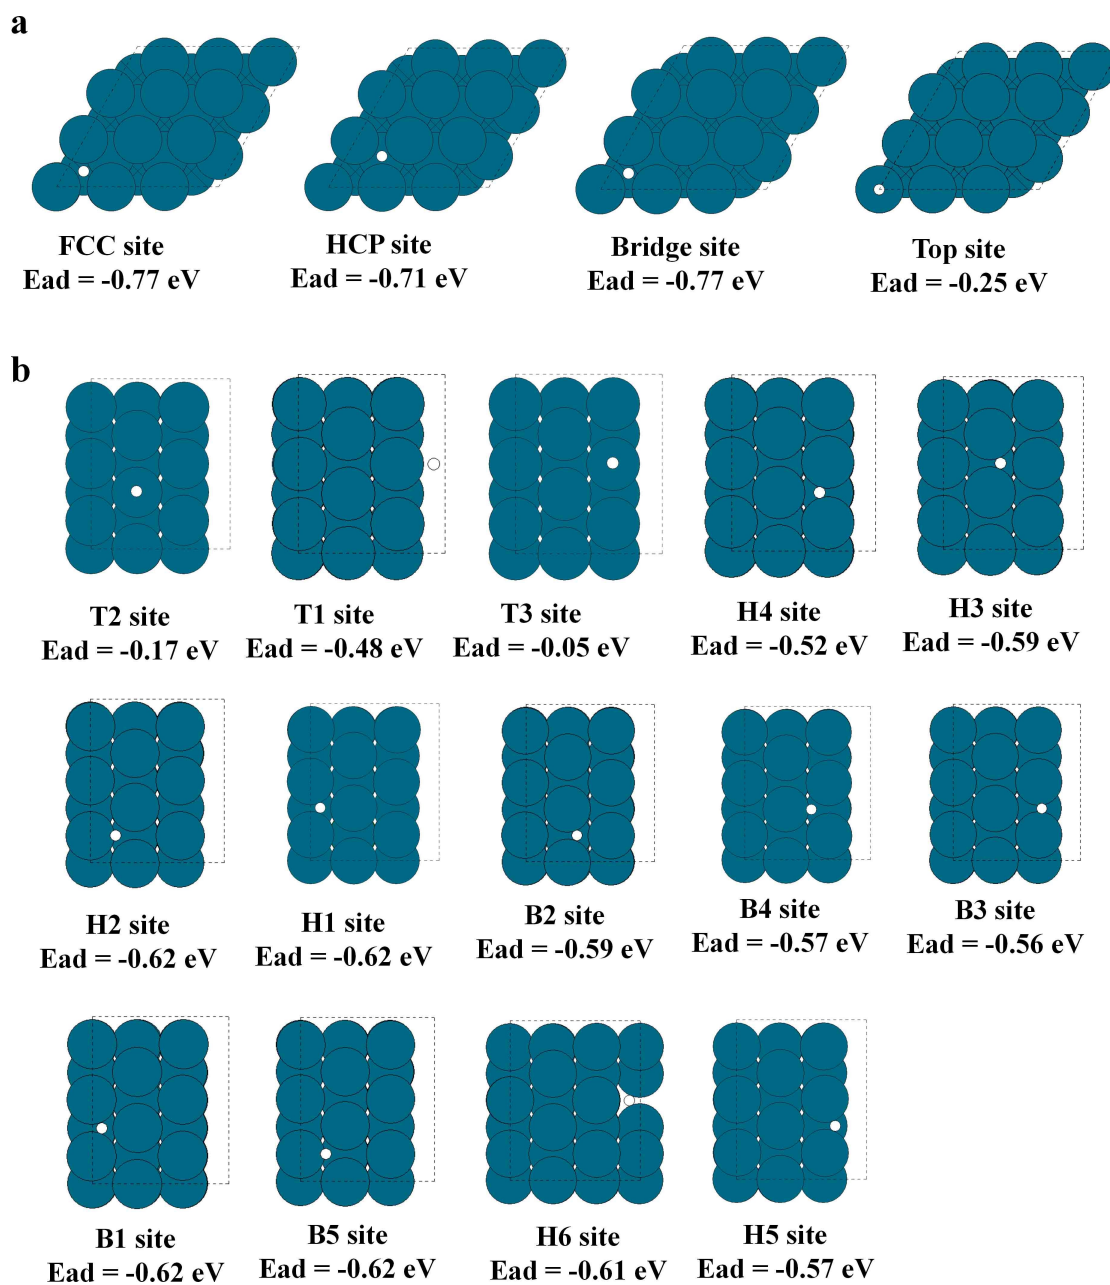

**Fig. S15** | The most stable adsorption models and corresponding adsorption energy values for H adsorbed on different sites of Pd(111) (a) and Pd(211) (b).

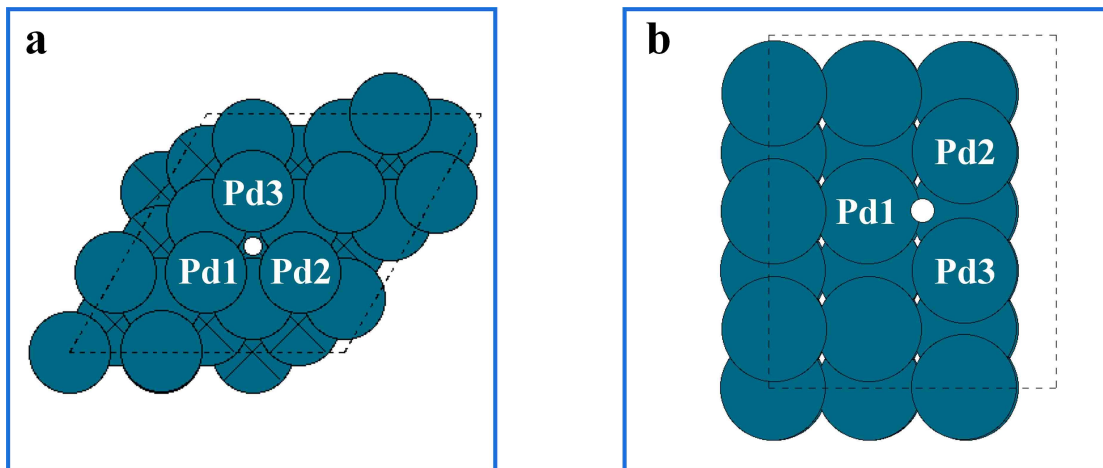

**Fig. S16** | Models of 1 H\* adsorbed on Pd (111) (**a**), and Pd (211) (**b**). Pd1, Pd2, and Pd3 are atoms bonded to the 1 H\*.

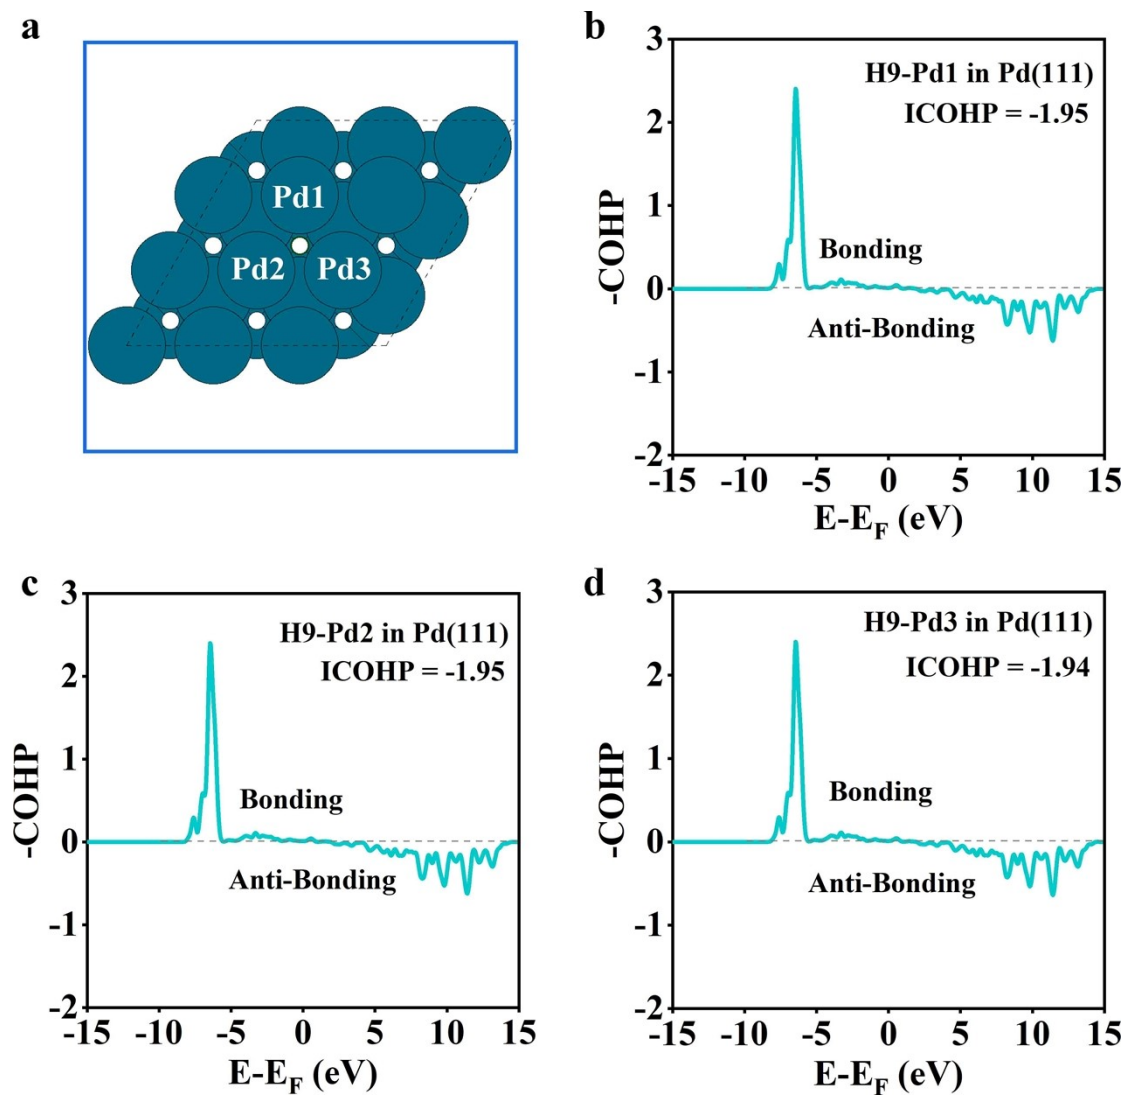

**Fig. S17** | Models of high coverage H\* adsorbed on Pd (111). Pd1, Pd2, and Pd3 are atoms bonded to the 9th H\* (a), COHP for the ninth H\* bonded to Pd1 (b), Pd2 (c), and Pd3 (d) of Pd (111).

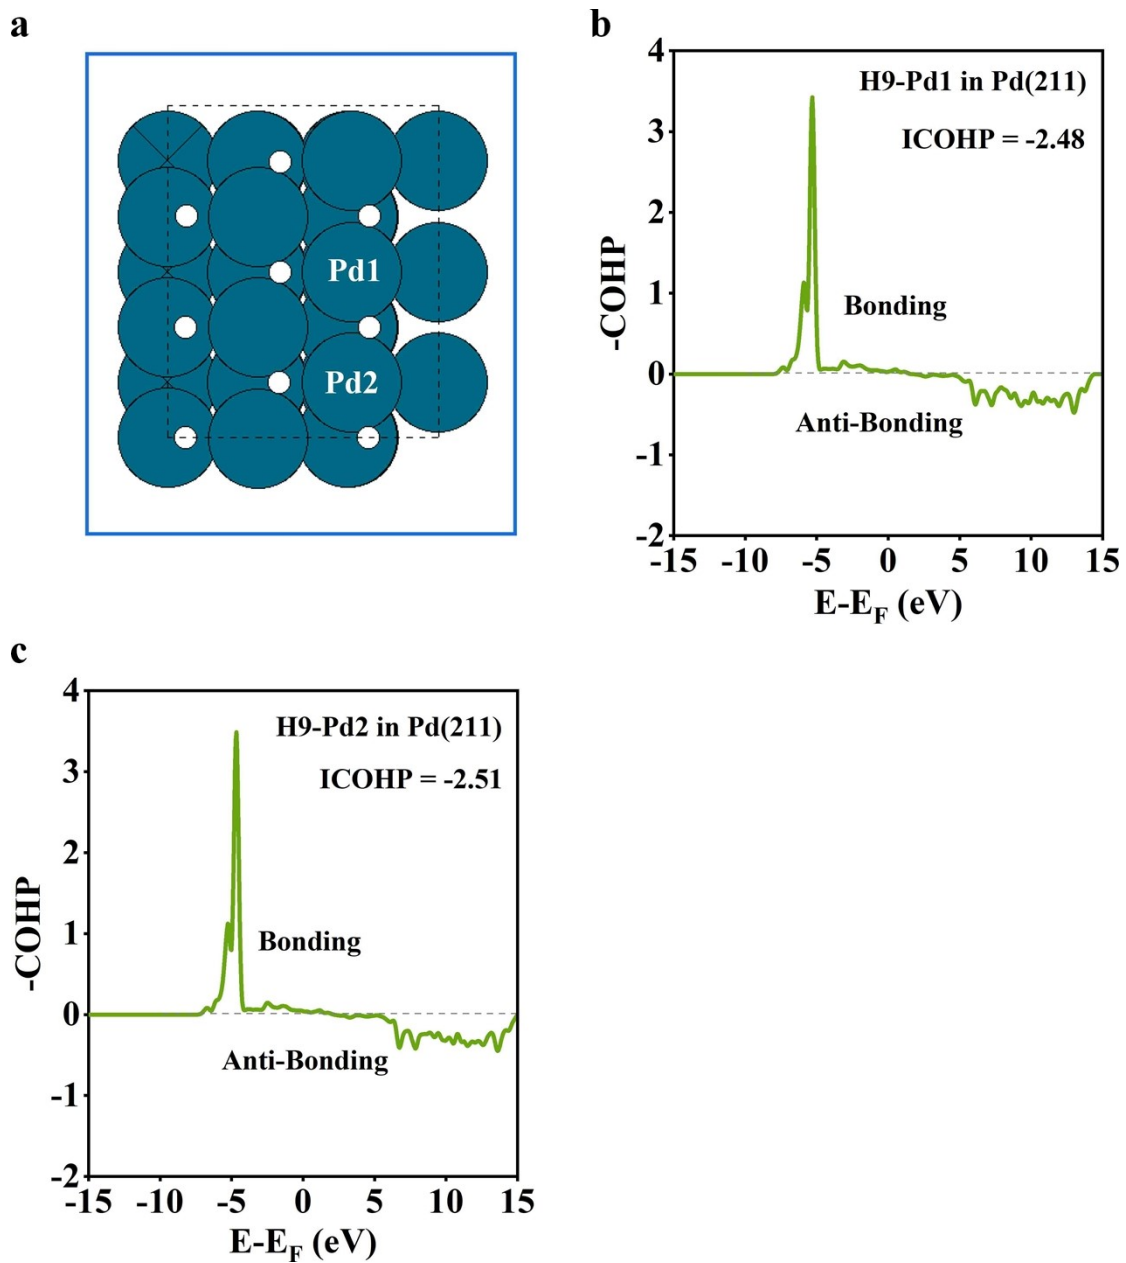

**Fig. S18** | Models of high coverage H\* adsorbed on Pd (211) (a). Pd1 and Pd2 are atoms bonded to the 9th H\*. COHP for the ninth H\* bonded to Pd1 (b), Pd2 (c) of Pd (211).

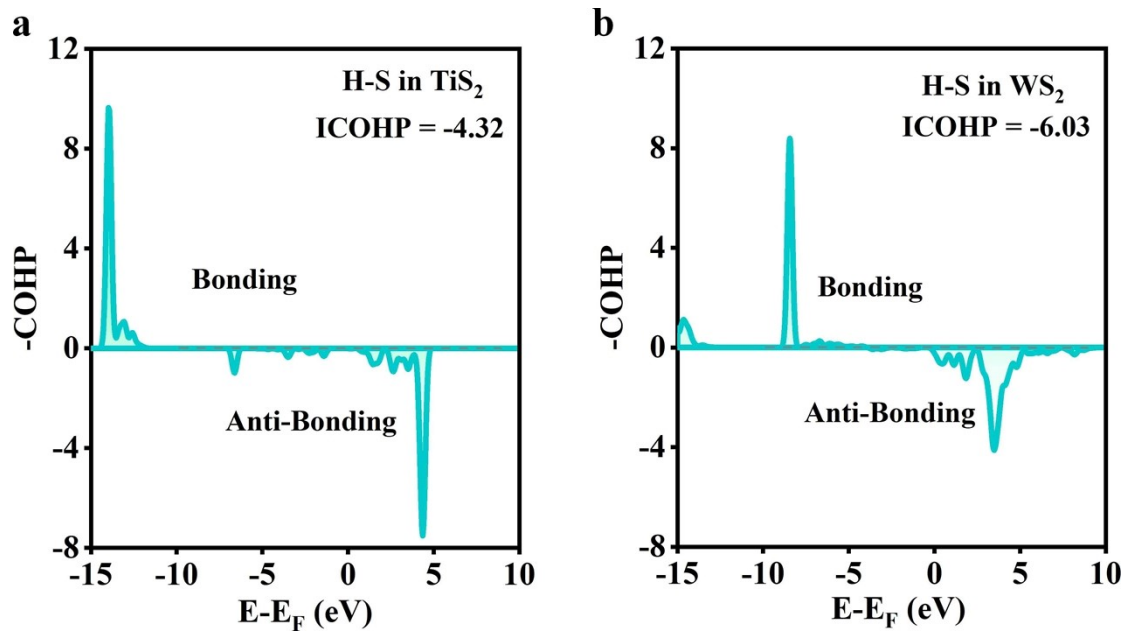

**Fig. S19** | COHP for the H\* and S in  $\text{TiS}_2$  (a), and  $\text{WS}_2$  (b).

**Table S1.** Comparative analysis of electrocatalytic Activity: Pd-MoS<sub>2</sub>, Pd-WS<sub>2</sub>, Pd-TiS<sub>2</sub> composites vs. previously reported Pd-decorated 2D catalysts for HER Application in 0.5M H<sub>2</sub>SO<sub>4</sub>.

| Catalysts                               | $\eta_{10}$<br>(mV) | Tafel slope<br>(mV/dec) | Reference                                                   |
|-----------------------------------------|---------------------|-------------------------|-------------------------------------------------------------|
| Pd ND/DR-MoS <sub>2</sub>               | 103                 | 41                      | <i>J. Mater. Chem. A</i> 2016, <b>4</b> , 4025-4031         |
| 7.4 % Pd-MoS <sub>2</sub>               | 205                 | 91                      | <i>Appl. Surf. Sci.</i> 2023, <b>642</b> , 158563           |
| Pd-MoS <sub>2</sub> /MWCNT              | 120                 | 54                      | <i>Int. J. Hydrog. Energy</i> 2017, <b>42</b> , 2961-2969.  |
| 1% Pd-MoS <sub>2</sub>                  | 89                  | 80                      | <i>Nat. Commun.</i> 2018, <b>9</b> , 2120                   |
| Pd-graphene                             | 80                  | 46                      | <i>Int. J. Hydrog. Energy</i> 2015, <b>40</b> , 16184-16191 |
| VS <sub>2</sub> -Pd                     | 133                 | 75                      | <i>Inorg. Chem.</i> 2020, <b>59</b> , 10197-10207           |
| Pd NWs@MoS <sub>2</sub>                 | 25                  | 44                      | <i>Nano Research</i> 2016, <b>9</b> , 2662-2671.            |
| VGN@Pd <sub>0.2</sub> -MoS <sub>2</sub> | 106                 | 60                      | <i>J. Power Sources</i> 2020, <b>456</b> , 227998           |
| d-PdTe <sub>x</sub>                     | 70                  | 116.4                   | <i>ACS Catal.</i> 2023, <b>13</b> , 2601–2609               |
| Pd-MXene                                | 149                 | 96                      | <i>Energy Fuels</i> 2023, <b>37</b> , 16856–16865           |
| Pd <sub>0.1</sub> TaS <sub>2</sub>      | 241                 | 52.7                    | <i>J. Mater. Chem. A</i> 2017, <b>5</b> , 22618-22624       |
| Pd <sub>0.23</sub> NbS <sub>2</sub>     | 157                 | 50                      | <i>Chem. Mater.</i> 2019, <b>31</b> , 13, 4726–4731         |
| <b>Pd-MoS<sub>2</sub></b>               | 70                  | 43                      | <b>This work</b>                                            |
| <b>Pd-WS<sub>2</sub></b>                | 113                 | 49                      | <b>This work</b>                                            |
| <b>Pd-TiS<sub>2</sub></b>               | 131                 | 61                      | <b>This work</b>                                            |
